# Supplementary material
Source: Research Square preprint supplement (doi:10.21203/rs.3.rs-9436401/v1)
Supplement: Supplementary file 1 [file 459d150d7b22877c15e98789.xlsx]

## Sheet: regeneration strategy (30 age)
Sample plot	Local Name	Major Regeneration Strategy
		From Seed			Remarks
1		No. species	pi	lnpi	pi*lnpi
2	Achiho	3	0.00914634	-4.6944	-0.0429366
2	Ajnoh	7	0.0213415	-3.8471	-0.0821028
2	Alhibo	1	0.00304878	-5.79301	-0.0176616
2	Atehu	19	0.0579268	-2.84857	-0.165009
2	Atehu	1	0.00304878	-5.79301	-0.0176616
3	Atehu	2	0.00609756	-5.09987	-0.0310967
3	Atehu	2	0.00609756	-5.09987	-0.0310967
3	Ateyo	3	0.00914634	-4.6944	-0.0429366
3	Atiho	28	0.0853659	-2.46081	-0.210069
3	Atiho	16	0.0487805	-3.02042	-0.147338
4	Atiho	10	0.0304878	-3.49043	-0.106416
4	Atiho	16	0.0487805	-3.02042	-0.147338
4	atiho	1	0.00304878	-5.79301	-0.0176616
4	Atiho	2	0.00609756	-5.09987	-0.0310967
4	Atiho	6	0.0182927	-4.00125	-0.0731937
4	Atiho	7	0.0213415	-3.8471	-0.0821028
4	Atihu	9	0.027439	-3.59579	-0.0986649
4	Atihu	8	0.0243902	-3.71357	-0.0905749
4	chabachi	15	0.0457317	-3.08496	-0.141081
4	chabachi	12	0.0365854	-3.30811	-0.121028
4	chawachi	6	0.0182927	-4.00125	-0.0731937
4	chawachi	6	0.0182927	-4.00125	-0.0731937
4	chawachi	13	0.0396341	-3.22806	-0.127942
5	chawachi	18	0.054878	-2.90264	-0.159291
5	chawachi	16	0.0487805	-3.02042	-0.147338
5	chawachi	2	0.00609756	-5.09987	-0.0310967
5	gouro	2	0.00609756	-5.09987	-0.0310967
5	gouro	2	0.00609756	-5.09987	-0.0310967
6	Hubalo	2	0.00609756	-5.09987	-0.0310967
6	Jemo	2	0.00609756	-5.09987	-0.0310967
6	Jemo	2	0.00609756	-5.09987	-0.0310967
6	Jemo	2	0.00609756	-5.09987	-0.0310967
6	Jemo	2	0.00609756	-5.09987	-0.0310967
6	Jemo	2	0.00609756	-5.09987	-0.0310967
6	kijagni	6	0.0182927	-4.00125	-0.0731937
7	kijagni	6	0.0182927	-4.00125	-0.0731937
7	kijagni	3	0.00914634	-4.6944	-0.0429366
7	kijagni	10	0.0304878	-3.49043	-0.106416
7	kijagni	7	0.0213415	-3.8471	-0.0821028
8	kijagni	3	0.00914634	-4.6944	-0.0429366
8	kijagni	2	0.00609756	-5.09987	-0.0310967
8	kijagni	2	0.00609756	-5.09987	-0.0310967
8	kijagni	2	0.00609756	-5.09987	-0.0310967
8	kijahan	3	0.00914634	-4.6944	-0.0429366
8	kijahan	1	0.00304878	-5.79301	-0.0176616
9	kijahan	1	0.00304878	-5.79301	-0.0176616
10	kijahan	3	0.00914634	-4.6944	-0.0429366
11	kijahan	10	0.0304878	-3.49043	-0.106416
11	Leyro	11	0.0335366	-3.39512	-0.113861
12	Leyro	1	0.00304878	-5.79301	-0.0176616
13	Leyro	1	0.00304878	-5.79301	-0.0176616
13	Leyro	1	0.00304878	-5.79301	-0.0176616
13	lorbayi	1	0.00304878	-5.79301	-0.0176616
14	nilorbahi	1	0.00304878	-5.79301	-0.0176616
14	ogono	4	0.0121951	-4.40672	-0.0537405
18	ogono	1	0.00304878	-5.79301	-0.0176616
18	ulam	2	0.00609756	-5.09987	-0.0310967
18	umono	1	0.00304878	-5.79301	-0.0176616
18		NO			-3.6219

## Sheet: Reneration strategy (control)
Vegetationcollection of woody species; Successional change of fallow woodlands in Gambella Region							-0.16444	-0.16444
	Study site Zone Agnuak		District Abobo		Kebele: Tegni	Age class: control	-0.00984304	-0.00984304
Plot no	L. name	No seedlings	Saplings	DBH(cm)	Height(m)	Remark	-0.0245316	-0.0245316
1	Achere			5	1.35		-0.00984304	-0.00984304
1	Acheri			7	2.5		-0.155822	-0.155822
1	Acheri			6	2		-0.124056	-0.124056
1	Acheri			8	3		-0.00544703	-0.00544703
1	Acheri			5	2		-0.124056	-0.124056
1	Acheri			5	2.1		-0.183195	-0.183195
1	Kajang	76	0.0576194	-2.8539	-0.16444	seed	-0.0138423	-0.0138423
1	Dedaoye	2	0.0015163	-6.49148	-0.00984304	seed	-0.0509088	-0.0509088
1	Orowayi	1	0.142857	-1.94591	-0.277987	sprouting	-0.137379	-0.137379
1	Chuam(Roqa)	6	0.0045489	-5.39287	-0.0245316	seed	-0.0860523	-0.0860523
1	Acheri			5	1.7		-0.0211342	-0.0211342
1	Acheri			5	2.5		-0.0509088	-0.0509088
1	Acheri			4	2		-0.0211342	-0.0211342
1	Acheri			6	2.5		-0.0278021	-0.0278021
1	Roqa	2	0.0015163	-6.49148	-0.00984304	seed	-0.0278021	-0.0278021
1	Kajang	70	0.0530705	-2.93613	-0.155822	seed	-0.017584	-0.017584
1	Acheri			7.5	2.1		-0.017584	-0.017584
1	Acheri			8	1.8		-0.0860523	-0.0860523
1	Kajang	50	0.0379075	-3.27261	-0.124056	seed	-0.0455313	-0.0455313
1	jemo	1	0.00075815	-7.18463	-0.00544703	seed	-0.017584	-0.017584
2	Acheri			4	1.6		-0.00984304	-0.00984304
2	Acheri			5	1.4		-0.0138423	-0.0138423
2	Acheri			5	1.6		-0.017584	-0.017584
2	Adidogoih			5	1.6		-0.0138423	-0.0138423
2	Adinagoye			6	1.4		-0.0138423	-0.0138423
2	Alink			7	1.4		-0.00984304	-0.00984304
2	Alink			6	1.5		-0.106012	-0.106012
3	Alink			7	2		-0.0370132	-0.0370132
3	Alink			7.5	1.65		-0.0138423	-0.0138423
3	Aromo			6	1.4		-0.08815	-0.08815
3	Aromo			9	2.5		-0.140574	-0.140574
3	jemo	50	0.0379075	-3.27261	-0.124056	seed	-0.218087	-0.218087
3	Kajang	90	0.0682335	-2.68482	-0.183195	seed	-0.0245316	-0.0245316
3	Chemcheri	1	0.142857	-1.94591	-0.277987	sprouting	-0.0535198	-0.0535198
3	orowayi	3	0.00227445	-6.08602	-0.0138423	seed	-0.0535198	-0.0535198
4	Uland	15	0.0113723	-4.47658	-0.0509088	seedlings	-0.12058	-0.12058
4	Arono			6	1.4		-0.0245316	-0.0245316
4	Arono			5	1.55		-0.0482472	-0.0482472
4	Arono			6	1.45		-0.017584	-0.017584
4	Arono			7	3		-0.030964	-0.030964
4	Kajangi	58	0.0439727	-3.12419	-0.137379	seedlings	-0.030964	-0.030964
4	Jemo	30	0.0227445	-3.78343	-0.0860523	seedlings	-0.0340308	-0.0340308
4	Jemo	5	0.00379075	-5.57519	-0.0211342	seedlings	-0.00984304	-0.00984304
4	Kajangi	15	0.0113723	-4.47658	-0.0509088	seedlings	-0.109759	-0.109759
4	Uland	5	0.00379075	-5.57519	-0.0211342	seedlings	-0.0138423	-0.0138423
5	Arono			6	2		-0.0138423	-0.0138423
5	Arono			6	2		-0.0211342	-0.0211342
5	Uland	7	0.00530705	-5.23872	-0.0278021	seedlings	-0.00984304	-0.00984304
5	Kajangi	7	0.00530705	-5.23872	-0.0278021	seedlings	-0.0751659	-0.0751659
5	Kajangi	4	0.0030326	-5.79833	-0.017584	seedlings	-0.00544703	-0.00544703
5	Jemo	4	0.0030326	-5.79833	-0.017584	seedlings	-0.0535198	-0.0535198
5	Arono			4	1.6		-0.030964	-0.030964
5	Atawo			7	1.8		-0.00984304	-0.00984304
5	Atawo			4.5	1.5		-0.017584	-0.017584
6	Kajangi	30	0.0227445	-3.78343	-0.0860523	seedlings	-0.0586025	-0.0586025
6	Ateyo			5	3		-0.0427571	-0.0427571
6	Ateyo			6	4		-0.0635163	-0.0635163
6	Ateyo			5	2		-0.00544703	-0.00544703
6	Doti	1	0.142857	-1.94591	-0.277987	sprouting	-0.0211342	-0.0211342
6	Ateyo			5	3		-0.00984304	-0.00984304
6	Ateyo			7	1.4		-0.00984304	-0.00984304
6	Ateyo			5	1.6		-0.0399197	-0.0399197
6	Ateyo			6	1.55		-0.0278021	-0.0278021
6	Ateyo			5	1.4		-0.0138423	-0.0138423
6	Kajangi	13	0.00985595	-4.61968	-0.0455313	seedlings	-0.0796038	-0.0796038
7	Kajangi	4	0.0030326	-5.79833	-0.017584	seedlings	-0.017584	-0.017584
7	Arono	2	0.0015163	-6.49148	-0.00984304	seedlings	-0.00544703	-0.00544703
7	Uland	3	0.00227445	-6.08602	-0.0138423	seedlings	-0.0211342	-0.0211342
7	Ateyo			4	1.35		-0.0560834	-0.0560834
7	Ateyo			3	1.4		-0.0399197	-0.0399197
7	Uland	4	0.0030326	-5.79833	-0.017584	seedlings	-0.0586025	-0.0586025
7	Kajangi	3	0.00227445	-6.08602	-0.0138423	seedlings	-0.0245316	-0.0245316
7	Uland	3	0.00227445	-6.08602	-0.0138423	seedlings	-0.0340308	-0.0340308
7	Jemo	2	0.0015163	-6.49148	-0.00984304	seedlings	-0.00544703	-0.00544703
8	Kajangi	40	0.030326	-3.49575	-0.106012	seedlings	-0.00984304	-0.00984304
8	Uland	10	0.0075815	-4.88204	-0.0370132	seedlings	-0.017584	-0.017584
8	Chabachi	3	0.00227445	-6.08602	-0.0138423	seedlings	-0.0399197	-0.0399197
8	Atiyo			9	3		-0.0340308	-0.0340308
8	Atiyo			7	1.7		-0.0211342	-0.0211342
8	Chabachi			4	1.35		-0.0245316	-0.0245316
8	Chabachi			9	3.5		-0.00544703	-0.00544703
8	Chemcher			4	2.5		-0.00544703	-0.00544703
8	Chemcher			7	3		-0.0682782	-0.0682782
8	Chemcher			7	4		-0.00984304	-0.00984304
8	Chemcher			8	3.5			-1.59943
8	Uland	31	0.0235027	-3.75064	-0.08815	seedlings		-3.61671
9	Chemcher			4	1.4
9	Uland	60	0.045489	-3.09028	-0.140574	seedlings
9	Chemcher			5	1.8
9	Chemcher			5	2
9	Chemcheri			7	1.35
9	Doti			7	2
9	Kajangi	120	0.090978	-2.39714	-0.218087	seedlings
9	Doti			8	5
9	Jemo	6	0.0045489	-5.39287	-0.0245316	seedlings
9	Kajangi	16	0.0121304	-4.41204	-0.0535198	seedlings
9	Doti			7	7
9	Jemo	16	0.0121304	-4.41204	-0.0535198	seedlings
9	Uland	48	0.0363912	-3.31343	-0.12058	seedlings
9	Holan			7	1.5
9	Holan			5	1.8
9	Holan			5	3
9	Holan			4	1.4
9	Holan			2	1.4
10	Holan			6	2.2
10	Holand			6	2
10	Holand			6	1.8
10	jemo			8	1.6
10	jemo			7	1.4
10	Jemo			5	1.7
10	Jemo	5
10	Jemo			6	1.6
10	Uland	6	0.0045489	-5.39287	-0.0245316	seedlings
10	Jemo			7	1.4
10	Jemo			6	1.5
10	Kejamo	14	0.0106141	-4.54557	-0.0482472	seedlings
10	Jemo	4	0.0030326	-5.79833	-0.017584	seedlings
10	Jemo	8	0.0060652	-5.10519	-0.030964	seedlings
10	Jemo			7	2
10	Jemo			21	6
10	Jemo			5	1.4
10	Jemo			5	1.6
11	Angech	2	0.285714	-1.25276	-0.357932	sproutings
11	Acheri	2	0.285714	-1.25276	-0.357932	sproutings
11	Uland	8	0.0060652	-5.10519	-0.030964	seedlings
11	kejang	9	0.00682335	-4.9874	-0.0340308	seedlings
11	Adidogoih	2	0.0015163	-6.49148	-0.00984304	seedlings
11	kejang	42	0.0318423	-3.44696	-0.109759	seedlings
11	Jemo			5	2
11	Jemo			5	3
11	Jemo			12	4
11	Jemo			5	1.5
11	Jemo			5	1.4
11	Jemo			5	1.8
11	Jemo			7	1.9
11	Jemo			4	1.4
11	Jemo	3	0.00227445	-6.08602	-0.0138423	seedlings
11	Jemo			6	1.5
11	Jemo			7	1.8
11	Adidogoih	3	0.00227445	-6.08602	-0.0138423	seedlings
12	kejang	5	0.00379075	-5.57519	-0.0211342	seedlings
12	Chancher	2	0.0015163	-6.49148	-0.00984304	seedlings
12	Uland	25	0.0189538	-3.96575	-0.0751659	seedlings
12	Jemo			5	1.5
12	Kajangi			7	2.5
12	Kajangi			8	4
12	Kajangi			10	4
12	Kejang	15
12	kejang			13	3
12	Kejang			9	3
12	kejang			6	2
12	kejang		19
12	kejang			5.2	1.8
12	Adidogoih	1	0.00075815	-7.18463	-0.00544703	seedlings
12	kejang	16	0.0121304	-4.41204	-0.0535198	seedlings
13	kejang			6	1.5
13	Uland	8	0.0060652	-5.10519	-0.030964	seedlings
13	kejang			5	1.5
13	kejang			3	1.5
13	kejang			7	1.8
13	Uladi			7	1.6
13	Ulam			6	1.6
13	Ulan			8	1.5
13	Ulan			5	1.35
13	Uland			14	8
13	Uland			7	1.4
13	Jemo	2	0.0015163	-6.49148	-0.00984304	seedlings
13	Uland	4	0.0030326	-5.79833	-0.017584	seedlings
13	Uland			8	1.5
13	Uland			6	1.6
13	Uland			7	2.3
13	Uland			10	3
13	Uland			15	1.4
13	Uland			7	2
13	Uland			7	1.8
14	Uland			7	1.9
14	Uland			6	1.7
14	Uland			8	2.5
14	Uland			10	3
14	kejang	18	0.0136467	-4.29426	-0.0586025	seedlings
14	Uland			10	3
14	Uland			13	3
14	Uland	12	0.0090978	-4.69972	-0.0427571	seedlings
14	Uland			9	2
14	Uland			6	2
14	Uland			5	1.6
14	Uland			5	3.1
14	Uland			7	1.3
15	kejang	20	0.015163	-4.1889	-0.0635163	seedlings
15	chobochi	1	0.00075815	-7.18463	-0.00544703	seedlings
15	Uland	5	0.00379075	-5.57519	-0.0211342	seedlings
15	Uland			8	2
15	Uland			8	3
15	Uland			10	3
15	kejang	2	0.0015163	-6.49148	-0.00984304	seedlings
15	Uland	2	0.0015163	-6.49148	-0.00984304	seedlings
16	kejang	11	0.00833965	-4.78673	-0.0399197	seedlings
16	Uland	7	0.00530705	-5.23872	-0.0278021	seedlings
16	Jemo	3	0.00227445	-6.08602	-0.0138423	seedlings
16	Uland	27	0.0204701	-3.88879	-0.0796038	seedlings
16	kejang	4	0.0030326	-5.79833	-0.017584	seedlings
16	Chemcher	1	0.00075815	-7.18463	-0.00544703	seedlings
17	Uland			7	2.1
17	Uland			8	1.7
17	Uland			6	1.4
17	Uland	19
17	Uland			14	3
17	Jemo	5	0.00379075	-5.57519	-0.0211342	seedlings
17	Uland			8	4
17	Uland			5	1.8
17	Uland			5	2
17	Uland	17	0.0128886	-4.35142	-0.0560834	seedlings
17	kejang	11	0.00833965	-4.78673	-0.0399197	seedlings
18	kejang	18	0.0136467	-4.29426	-0.0586025	seedlings
18	Uland	6	0.0045489	-5.39287	-0.0245316	seedlings
18	Jemo	9	0.00682335	-4.9874	-0.0340308	seedlings
18	Aromo	1	0.00075815	-7.18463	-0.00544703	seedlings
18	Chewechi	2	0.0015163	-6.49148	-0.00984304	seedlings
18	Uland			5	1.4
18	Uland			10	4
19	Jemo	4	0.0030326	-5.79833	-0.017584	seedlings
19	Uland			4	2.8
19	Uland			4	1.4
19	Uland			4	1.5
19	Uland			7	3
19	Uland			5	2
19	Uland			4	1.5
19	kejang	11	0.00833965	-4.78673	-0.0399197	seedlings
19	Jemo	9	0.00682335	-4.9874	-0.0340308	seedlings
19	Uland			12	4
19	Uland			5	3
19	Chemcher	5	0.00379075	-5.57519	-0.0211342	seedlings
19	kejang	6	0.0045489	-5.39287	-0.0245316	seedlings
19	Atawo	1	0.00075815	-7.18463	-0.00544703	seedlings
19	Uland			4	1.8
20	Uland			5	1.5
20	Uland			3	1.4
20	Uland			7	3
20	Uland			3	1.4
20	Uland			4	1.5
20	Uland			12	3
20	Uland			8	2.5
20	Uland			5.7	2
20	Jemo	1	0.00075815	-7.18463	-0.00544703	seedlings
20	kejang	22	0.0166793	-4.09359	-0.0682782	seedlings
20	Uland			7	2.8
20	Uland			3	1.8
20	Ulandi			7	1.4
20	Ulandi			8	1.35
20	ulandi			9	1.55
20	Acheri	2	0.0015163	-6.49148	-0.00984304	seedlings
20	ulandi			8	1.7
		1365	19		-3.78542
					1.459
					318.865
					318.865
					318.865

## Sheet: Regeneration strategy (age 15)
Vegetationcollection of woody species; Successional change of fallow woodlands in Gambella Region
Study site Zone Agnuak			District Abobo		Kebele: Tegni	Age class: Age 15	Remark
Plot no	L. name	No seedlings	Saplings	DBH(cm)	Height(m)	Remark
1	Ajegnu	7
1	Ajigno	2					from seed
1	Akagno			6	2.7		from seed
1	Akagnu	1
1	Akano			6	2.8
1	Akano			13	3.8
2	Akano			5	2.3
2	Akano			6	2.5
3	Akano			5	1.4
3	Akano	2
3	Atawo	2
3	Atiyo	2					sprouting
3	bo'do	6					sprouting
3	Dwong	6					sprouting
3	Gaura			7.4	3.1		sprouting
3	Gaura			6	2
4							No regeneration due to forest fire
5							No regeneration due to forest fire
6	Gaura			5	1.8
6	Guara			6	1.8
6	Guara			5	2.5
6	Guara			6	1.5
6	Guara			4	2.1
6	Jewa	2					seedlings
7	Kagno			7	1.4
7	Kagno			6	1.5
7	Kegno			6	1.4
7	Kegno	1
7	Kegnu	2
7	Kegnu			8.5	1.4		seedlings
7	Kejang	1					seedlings
7	Keshu			5	1.5		seedlings
7	Mogno			5	1.4		seedlings
8	Mogno			5	1.6
9	Mogno			6	1.5
9	Mogno			7	1.5
9	Mogno			5	1.4
9	Mogno			6	2
10	Mogno			8	1.9
10	Mogno			5	1.4
10	Mogno			7	1.7
10	Mogno			7	1.8
10	Mogno	5
10	No
10	No
10	No						seedlings
11	No
12	Orowo			9	1.8
12	Orowo			9	2
12	Pobo	1
12	Pobo			7	1.7
12	Pok			6	1.8
12	Pok			5	1.5
12	Pok			7	1.4
12	Pok			6	3		seedlings
12	Pok			4	1.8		seedlings
12	Pok	1					seedlings
12	Puth			8	1.8
12	Puth			14	1.85
13	Puth			14	1.9
14	Puth			10	1.7
15	Puth			7	1.6
15	Puth			14	1.9
15	Puth			10	1.4
16	Puth			9	1.7
16	Puth			7	1.5
16	Puth			10	1.6		Sprouting
17	Puth			6	1.5
17	Puth			5	1.4		seedlings
17	Puth			6	1.65		seedlings
17	Puth			6	1.4		seedlings
17	Puth			7	1.5
17	Puth			9	1.7
18	Ubaro			8	2.5		seedlings
18	Ulam			5	1.7		seedlings
19	Ulam			6	2
19	Ulam			7	1.5
19	Ulam			4	1.7
19	Ulam			6	1.4
19	Ulam			5	1.6
19	Ulam			7	1.8
19	Uland	1
19	Ulemo	11
19	Ulemo	8
19	Ulemo	5
19	Uliyado	2
19	Uliyado	1
19	Uliyado			6	2
19	Uliyado			6	1.8
19	Urech	1
19	Urech	3
19	Urech			12.5	2.1		Sprouting
20	Urech			10	2.6
20	Urewech			17	2.5
20	Urewech	1
20	Urewech			7	1.7
20	Urewech			6.5	1.65
20	Urewech			6.5	2.5		Sprouting
20	Urewech			7	2.6
20	Urewech			7	1.7
20	Urewech			7	2
20	Urewech			17	3		Sprouting
20	Urewech			21	3
20	Urewech			11	1.8
20	Urewech			12	1.5		Sprouting
		74

## Sheet: Regeneration strategy (age 5)
Vegetationcollection of woody species; Successional change of fallow woodlands in Gambella Region
Study site Zone Agnuak			District Abobo		Kebele: Tegni	Age class: Age 5	Remark
Plot no	L. name	No seedlings	Saplings	DBH(cm)	Height(m)	Remark
1	Agigno	6				Sprouting
1	Agigno	8				Sprouting
2	Ajigno	5				Sprouting
2	Ajugno	6				Sprouting
2	Akano	4		sprout		Sprouting
2	Akano	5				Sprouting
2	Akano	4				Sprouting
2	Akano			7	1.7
2	Atawo	5
2	Atawo	5
2	Atawo	16				seed
2	Atawo	3				seed
2	Atawo			8	2.5
2	Atawo	2		seed		Sprouting
2	Atawo	20				Sprouting
2	Atawo	3		sprout		Sprouting
3	Atawo	5				Sprouting
3	Atawo	8
3	Atawo	7				Sprouting
3	Atawu	4				Sprouting
3	Ateyo	10				Sprouting
3	Atiwo	50
3	Atiyo	60				Sprouting
3	Atiyo	11				seed
3	Chear			5	1.8
4	Chear			4	1.4
4	Chear			6	1.5
4	Chear	3				Sprouting
4	chemcher	6				seed
5	Chipolo	2
5	Chipolo	2
5	Chipolo	2
5	Chipolo	2
5	Chipolo			3	1.61
5	Chipolo	4
5	Chipolo	1
6	Chipolo	4
6	Chipolo	23
6	Chipolo	8
6	Chipolo	9				Sprouting
6	Chipolo	2				Sprouting
6	Chipolo	2				seed
6	Chipolo	2				seed
6	Chipolo	6				seed
7	Chipolo			10	1.8
7	Chipolo			10	2.3
7	doang	1				Sprouting
8	Doti	13				Sprouting
8	duang	1				Sprouting
8	Duwang	1		seed		Sprouting
9	gaoro	3				Sprouting
9	gaoro			4	1.7
9	gaoro			5	1.8
9	gaoro			7	2.5
9	gaoro			6	2.5
9	gaoro			5	1.5
9	gaoro			6	1.7
9	gara	1
10	goara	16
10	goara			3	1.8
10	goara			5	1.6
10	goara			6	1.7
10	goara			4	1.8
10	goara			5	1.9
10	goara	4
10	goara			6	1.4
11	goara			5	1.7
11	goara			4	2
12	Guara	3				seedlings
12	Guara	1				seedlings
12	guara	1
12	guara			4	1.7
12	guara			2.9	3
12	guara			5	2.5
12	guara			6	3
12	guara			4	2.5
12	guara	8
12	guara	3
12	Guwuro			3	1.9
13	Guwuro			4	1.7
13	Guwuro			3	2.8
13	Guwuro			7	1.9
13	Guwuro			6	3
13	Guwuro			7	2.5
13	Kagno	7		sprout
13	kegna	4		sprout
13	Kegna	1				seedlings
13	Kegno	4				seedlings
14	Kegno	13				seedlings
14	Kegno	4				seedlings
14	Kegno	14
14	Kegno	1
14	kegnu	1		seed
14	la'a	1		seed
14	laro			11	3
14	Laro	2
14	Laro	4				seed
14	Laro			4	1.7
14	Laro			8	2.5
14	Laro			12	3
14	Lero	1				sprouting
14	lero			10	4
14	Obolo	2				seed
14	Oboloh			14	3
14	Oliyado	2				sprouting
14	Pobo	12				seed
15	pobo	4				seed
15	Pobo			5	2.6
15	Pobo	2
15	pobo	2				seed
15	pobo			12	2.4
15	Pok	6				seed
16	Pok			6	1.4
16	Pok	3				seed
16	pok			15	3
16	pok			5	1.7
17	Puth	4				seed
17	Tagu	20
17	Tango	1				seed
18	Tibo	3		sprout		sprout
18	Tibo	12				seed
18	Uchino	1
18	Uchino	1
18	Uchino	4
18	Ulah	7
19	Ulam			6	1.4
19	Ulam			8	1.7
19	Ulam	3
20	Ulam	3				sprouting
20	uliyada	1				sprouting
20	uliyado			10	2
20	Uliyoma	4
20	Urewech	5
20	Urewech	1		seed
20	Urewech	15
20	Urewech			7.4	1.4
		556	193 seed
			363 sprout

## Sheet: diversity
CONTROL
L. name	No.Species	pi	lnpi	p*lnpi	H'	Vegetation strategies	Control	Age 30	Age 15	Age 5
Achere	15	0.09375	-2.36712	-0.221918	2.087	Seedling	3.78	3.62	2.56	2.9
Adinagoye	2	0.0125	-4.38203	-0.0547753		Sprout	1.55	0	1.94	2.68
Alink	4	0.025	-3.68888	-0.092222
Aromo	9	0.05625	-2.87795	-0.161885
Atawo	2	0.0125	-4.38203	-0.0547753
Ateyo	10	0.0625	-2.77259	-0.173287
Atiyo	2	0.0125	-4.38203	-0.0547753
Chabachi	2	0.0125	-4.38203	-0.0547753
Chemcher	8	0.05	-2.99573	-0.149787
Doti	3	0.01875	-3.97656	-0.0745605
Holand	8	0.05	-2.99573	-0.149787
jemo	22	0.1375	-1.98413	-0.272818
Kajangi	13	0.08125	-2.51022	-0.203956
Ulandi	60	0.375	-0.980829	-0.367811
				2.087
AGE 30	No.Species	pi	lnpi	p*lnpi	H'
Achiho	3	0.00882353	-4.73033	-0.0417382	1.803
Ajnoh	7	0.0205882	-3.88304	-0.0799448
Alhibo	1	0.00294118	-5.82895	-0.017144
Atehu	130	0.382353	-0.961411	-0.367598
chabachi	27	0.0794118	-2.53311	-0.201159
chabachi	73	0.214706	-1.53849	-0.330322
gouro	4	0.0117647	-4.44265	-0.0522665
Hubalo	2	0.00588235	-5.1358	-0.0302106
Jemo	10	0.0294118	-3.52636	-0.103716
Kijangi	59	0.173529	-1.75141	-0.303921		Successional stage	regenaration type
Leyro	14	0.0411765	-3.18989	-0.131348			sprout	seed
lorbayi	1	0.00294118	-5.82895	-0.017144		Control	0.527903	99.4721		Successional stage	Regeneration source percentage
Nilorbani	1	0.00294118	-5.82895	-0.017144		Age 30	0	100			seed	sprout
ogono	5	0.0147059	-4.21951	-0.0620516		Age 15	51.9231	48.0769		age 5	40	60
ulam	2	0.00588235	-5.1358	-0.0302106		Age 5	60	40		age 15	48.07	51.93
umono	1	0.00294118	-5.82895	-0.017144						age 30	100	0
				1.803						control	99.47	0.53
Age 15	No.Species	pi	lnpi	p*lnpi	H'
Ajigno	9	0.0608108	-2.79999	-0.17027	-2.73111
Akagno	2	0.0135135	-4.30407	-0.058163
Akano	7	0.0472973	-3.0513	-0.144318
Atawo	2	0.0135135	-4.30407	-0.058163
Atiyo	2	0.0135135	-4.30407	-0.058163
bo'do	6	0.0405405	-3.20545	-0.129951
Dwong	6	0.0405405	-3.20545	-0.129951
Gaura	7	0.0472973	-3.0513	-0.144318
Jewa	2	0.0135135	-4.30407	-0.058163
Kagno	7	0.0472973	-3.0513	-0.144318
Kejang	1	0.00675676	-4.99721	-0.0337649
Keshu	1	0.00675676	-4.99721	-0.0337649
Mogno	15	0.101351	-2.28916	-0.23201
Orowo	2	0.0135135	-4.30407	-0.058163
Pobo	2	0.0135135	-4.30407	-0.058163
Pok	8	0.0540541	-2.91777	-0.157717
Puth	16	0.108108	-2.22462	-0.2405
Ubaro	1	0.00675676	-4.99721	-0.0337649
Ulam	7	0.0472973	-3.0513	-0.144318
Uland	1	0.00675676	-4.99721	-0.0337649
Ulemo	24	0.162162	-1.81916	-0.294999
Uliyado	2	0.0135135	-4.30407	-0.058163
Urech	18	0.121622	-2.10684	-0.256237
				-2.08713
Age 5	No.Species	pi	lnpi	p*lnpi	H'
Agigno	14	0.0236088	-3.74614	-0.0884417	-2.78948
Ajigno	5	0.0084317	-4.77576	-0.0402678
Ajugno	6	0.010118	-4.59343	-0.0464766
Akano	14	0.0236088	-3.74614	-0.0884417
Atawo	79	0.133221	-2.01575	-0.26854
Atiyo	131	0.220911	-1.51	-0.333574
Chear	6	0.010118	-4.59343	-0.0464766
chemcher	6	0.010118	-4.59343	-0.0464766
Chipolo	72	0.121417	-2.10853	-0.25601
doang	3	0.00505902	-5.28658	-0.0267449
Doti	13	0.0219224	-3.82025	-0.083749
gaoro	10	0.0168634	-4.08261	-0.0688467
goara	29	0.0489039	-3.0179	-0.147587
guara	21	0.0354132	-3.34067	-0.118304
Guwuro	6	0.010118	-4.59343	-0.0464766
Kagno	43	0.0725126	-2.62399	-0.190273
kegna	5	0.0084317	-4.77576	-0.0402678
kegnu	1	0.00168634	-6.38519	-0.0107676
la'a	1	0.00168634	-6.38519	-0.0107676
laro	12	0.0202361	-3.90029	-0.0789266
Oboloh	3	0.00505902	-5.28658	-0.0267449
Oliyado	2	0.00337268	-5.69205	-0.0191975
Pobo	22	0.0370995	-3.29415	-0.122211
Puth	4	0.00674536	-4.9989	-0.0337194
Tagu	20	0.0337268	-3.38946	-0.114316
Tango	1	0.00168634	-6.38519	-0.0107676
Tibo	15	0.0252951	-3.67714	-0.0930138
Uchino	6	0.010118	-4.59343	-0.0464766
Ulah	7	0.0118044	-4.43928	-0.052403
Ulam	8	0.0134907	-4.30575	-0.0580877
uliyado	2	0.00337268	-5.69205	-0.0191975
Uliyoma	4	0.00674536	-4.9989	-0.0337194
Urewech	22	0.0370995	-3.29415	-0.122211
				-2.78948

## Sheet: Age 15
AGE 15 Seedling		pi	lnpi	pi*lnpi	H'	AGE15 Sprout		pi	lnpi	pi*lnpi	H'
Name of sps	No.sps
Ajegnu	7	0.28	-1.27297	-0.35643	-2.56312	Ajegnu	7	0.259259	-1.34993	-0.349981	-1.94366		25	27
Ajigno	2	0.08	-2.52573	-0.202058		Atiyo	2	0.0740741	-2.60269	-0.192792
Akagno	1	0.04	-3.21888	-0.128755		bo'do	6	0.222222	-1.50408	-0.334239
Jewa	2	0.08	-2.52573	-0.202058		Dwong	6	0.222222	-1.50408	-0.334239
Kegnu	1	0.04	-3.21888	-0.128755		Gaura	1	0.037037	-3.29584	-0.122068
Kejang	1	0.04	-3.21888	-0.128755		Puth	1	0.037037	-3.29584	-0.122068
Keshu	1	0.04	-3.21888	-0.128755		Urech	1	0.037037	-3.29584	-0.122068
Mogno	1	0.04	-3.21888	-0.128755		Urewech	1	0.037037	-3.29584	-0.122068
No	1	0.04	-3.21888	-0.128755		Urewech	1	0.037037	-3.29584	-0.122068
Pok	1	0.04	-3.21888	-0.128755		Urewech	1	0.037037	-3.29584	-0.122068
Pok	1	0.04	-3.21888	-0.128755						-1.94366
Pok	1	0.04	-3.21888	-0.128755
Puth	1	0.04	-3.21888	-0.128755				per% sprout	51.9231
Puth	1	0.04	-3.21888	-0.128755
Puth	1	0.04	-3.21888	-0.128755
Ubaro	1	0.04	-3.21888	-0.128755
Ulam	1	0.04	-3.21888	-0.128755
				-2.56312
		per% seedling	48.0769

## Sheet: Age 5
Age 5 Seedling	N.species	pi	lnpi	pi*lnpi	H'	Age 5 Sprout	N.species	pi	lnpi	pi*lnpi	H'
Agigno	6	0.046875	-3.06027	-0.14345	-2.83509	Agigno	14	0.0729167	-2.61844	-0.190928	-2.63013
Atawo	19	0.148438	-1.90759	-0.283158
		0				Ajigno	5	0.0260417	-3.64806	-0.0950015
Atiyo	11	0.0859375	-2.45413	-0.210902		Ajugno	6	0.03125	-3.46574	-0.108304
chemcher	6	0.046875	-3.06027	-0.14345		Akano	4	0.0208333	-3.8712	-0.08065
Chipolo	2	0.015625	-4.15888	-0.0649825		Akano	5	0.0260417	-3.64806	-0.0950015										s.stage	seed	sprout
Chipolo	2	0.015625	-4.15888	-0.0649825		Akano	4	0.0208333	-3.8712	-0.08065										control	1319	7
Chipolo	6	0.046875	-3.06027	-0.14345		Atawo	2	0.0104167	-4.56435	-0.0475453					Regeneration type					30	328	0
Guara	3	0.0234375	-3.75342	-0.0879707		Atawo	20	0.104167	-2.26176	-0.2356										15	25	27
Guara	1	0.0078125	-4.85203	-0.0379065		Atawo	3	0.015625	-4.15888	-0.0649825				Successional stage	Seed	sprout	Seed	sprout		5	128	192
Kegna	1	0.0078125	-4.85203	-0.0379065		Atawo	5	0.0260417	-3.64806	-0.0950015					N.species		abudance
Kegno	4	0.03125	-3.46574	-0.108304		Atawo	7	0.0364583	-3.31159	-0.120735				age 5	15	14	128	192
Kegno	13	0.101562	-2.28708	-0.232282		Atawu	4	0.0208333	-3.8712	-0.08065				age 15	17	9	25	27
Kegno	4	0.03125	-3.46574	-0.108304		Ateyo	10	0.0520833	-2.95491	-0.153902				age 30	18	0	328	0
Laro	4	0.03125	-3.46574	-0.108304		Atiyo	60	0.3125	-1.16315	-0.363485				control	17	5	1319	7
Obolo	2	0.015625	-4.15888	-0.0649825		Chear	3	0.015625	-4.15888	-0.0649825					Successional stage	age 5	age 15	age 30	control
Pobo	12	0.09375	-2.36712	-0.221918		Chipolo	9	0.046875	-3.06027	-0.14345					No.sps	15	17	18	17	seed
pobo	4	0.03125	-3.46574	-0.108304		Chipolo	2	0.0104167	-4.56435	-0.0475453				type of seed source		14	9	0	5	sprout
pobo	2	0.015625	-4.15888	-0.0649825		doang	1	0.00520833	-5.2575	-0.0273828						1319	328	25	128	seed
Pok	6	0.046875	-3.06027	-0.14345		Doti	13	0.0677083	-2.69255	-0.182308
Pok	3	0.0234375	-3.75342	-0.0879707		duang	1	0.00520833	-5.2575	-0.0273828				Successional stage	age 5		age 15		age 30		control
Puth	4	0.03125	-3.46574	-0.108304		Duwang	1	0.00520833	-5.2575	-0.0273828					seed	sprout	seed	sprout	seed	sprout	seed	sprout
Tango	1	0.0078125	-4.85203	-0.0379065		gaoro	3	0.015625	-4.15888	-0.0649825				N.SPS	15	14	17	9	18	0	17	5
Tibo	12	0.09375	-2.36712	-0.221918		Lero	1	0.00520833	-5.2575	-0.0273828				abu.	128	192	25	27	328	0	1319	7
				-2.83509		Oliyado	2	0.0104167	-4.56435	-0.0475453
						Tibo	3	0.015625	-4.15888	-0.0649825
						Ulam	3	0.015625	-4.15888	-0.0649825
	per% of seedling	40				uliyada	1	0.00520833	-5.2575	-0.0273828
										-2.63013
								per% sprout	60

## Sheet: control
Acheri	2	0.0015163	-6.49148	-0.00984304			Sprout	No.species	pi	lnpi	pi*lnpi
Adidogoih	6	0.0045489	-5.39287	-0.0245316
	3	0.00227445	-6.08602	-0.0138423			Orowayi	1	0.142857	-1.94591	-0.277987
	1	0.00075815	-7.18463	-0.00544703			Chemcheri	1	0.142857	-1.94591	-0.277987
Aromo	3	0.00227445	-6.08602	-0.0138423			Doti	1	0.142857	-1.94591	-0.277987
Atawo	1	0.00075815	-7.18463	-0.00544703			Angech	2	0.285714	-1.25276	-0.357932
Chabachi	3	0.00227445	-6.08602	-0.0138423			Acheri	2	0.285714	-1.25276	-0.357932
Chancher	8	0.0060652	-5.10519	-0.030964						H'	-1.54983
Chewechi	2	0.0015163	-6.49148	-0.00984304			sprou per%	0.527903
chobochi	1	0.00075815	-7.18463	-0.00544703
Chuam(Roqa)	6	0.0045489	-5.39287	-0.0245316
Dedaoye	2	0.0015163	-6.49148	-0.00984304
jemo	162	0.12282	-2.09703	-0.257558
Kajang	805	0.610311	-0.493787	-0.301363
orowayi	3	0.00227445	-6.08602	-0.0138423
Roqa	2	0.0015163	-6.49148	-0.00984304
Uland	313	0.237301	-1.43843	-0.34134
			H'	-1.057
	Per% of seedling	99.4721

## Sheet: Sheet1
Achiho		Ajigno		Agigno		Agigno			s.stage	seed	sprout
Ajnoh		Akagno		Atawo		Akano			control	1319	7
Alhibo		Akano		Atiyo		Atawo			30	328	0
Atehu		Atawo		chemcher		Ateyo			15	25	27
Ateyo		Atiyo		Chipolo		Chear			5	128	192
Atiho		bo'do		Guara		Chipolo
chabachi		Dwong		Kegna		doang
chawachi		Gaura		Kegno		Doti
gouro		Jewa		Laro		gaoro
Hubalo		Kagno		Obolo		Lero
Jemo		Kejang		Pobo		Oliyado
kijang		Keshu		Pok		Tibo
Leyro		Mogno		Puth		Ulam
lorbayi		Orowo		Tango		uliyada
nilorbahi		Pobo		Tibo
ogono		Pok
ulam		Puth
umono		Ubaro				Chipolo
		Ulam
		Uland
		Ulemo				duang
		Uliyado				Duwang
		Urech
		Age 5
		Agigno
		Ajigno
		Ajugno
		Akano
		Atawo
		Atiyo
		Chear
		chemcher
		Chipolo
		doang
		Doti
		gaoro
		goara
		guara
		Guwuro
		Kagno
		kegna
		kegnu
		la'a
		laro
		Oboloh
		Oliyado
		Pobo
		Puth
		Tagu
		Tango
		Tibo
		Uchino
		Ulah
		Ulam
		uliyado
		Uliyoma
		Urewech

## Sheet: NO.Sps and Abun
						Species richnes and Abundance among successional stage
Successional stage	Seed	sprout	Seed	sprout		Successional stage		age 5	age 15	age 30	control
	N.species		abudance			Species richness	seed	15	17	18	17
age 5	15	14	128	192			sprout	14	9	0	5
age 15	17	9	25	27		Abudance	seed	128	25	328	1319
age 30	18	0	328	0			sprout	192	27	0	7
control	17	5	1319	7
